# Supplementary material
Source: PubMed Central journal article supplement (PMC9751089)
Supplement: 41418_2022_1029_MOESM1_ESM.pdf [file 41418_2022_1029_MOESM1_ESM.pdf]

## Supplemental Material for

### **Aberrant activation of p53/p66Shc-mInsc axis increases asymmetric divisions and attenuates proliferation of aged mammary stem cells**

Chiara Priami<sup>1,6</sup>, Daniela Montariello<sup>1,6</sup>, Giulia De Michele<sup>1</sup>, Federica Ruscitto<sup>1</sup>, Andrea Polazzi<sup>1</sup>, Simona Ronzoni<sup>1</sup>, Giovanni Bertalot<sup>1,2</sup>, Giorgio Binelli<sup>3</sup>, Valentina Gambino<sup>1,5</sup>, Lucilla Luzi<sup>1</sup>, Marina Mapelli<sup>1</sup>, Marco Giorgio<sup>1,4</sup>, Enrica Migliaccio<sup>1,7</sup> and Pier Giuseppe Pelicci<sup>1,5,7</sup>

<sup>1</sup>European Institute of Oncology (IEO) IRCCS, Via Ripamonti 435, 20141 Milan, Italy

<sup>2</sup>U.O.M. Anatomia ed Istologia Patologica, Ospedale Santa Chiara, Largo Medaglie d'Oro 9, 38122 Trento, Italy

<sup>3</sup>Department of Biotechnology and Life Sciences, University of Insubria, Via Dunant 3, 21100 Varese, Italy

<sup>4</sup>Department of Biomedical Sciences, University of Padua, Via Bassi 58/B, 35131 Padova, Italy

<sup>5</sup>Department of Oncology and Hemato-Oncology, University of Milan, Via Santa Sofia 9, 20142 Milan, Italy

<sup>6</sup>These authors contributed equally to this work.

<sup>7</sup>Corresponding authors.

To whom correspondence should be addressed:

E.M.: [enrica.migliaccio@ieo.it](mailto:enrica.migliaccio@ieo.it); phone: +390294372198;

P.G.P.: [piergiuseppe.pelicci@ieo.it](mailto:piergiuseppe.pelicci@ieo.it); phone: +390257489831

***The authors declare no potential conflict of interests.***

Supplemental Figures

Figure S1

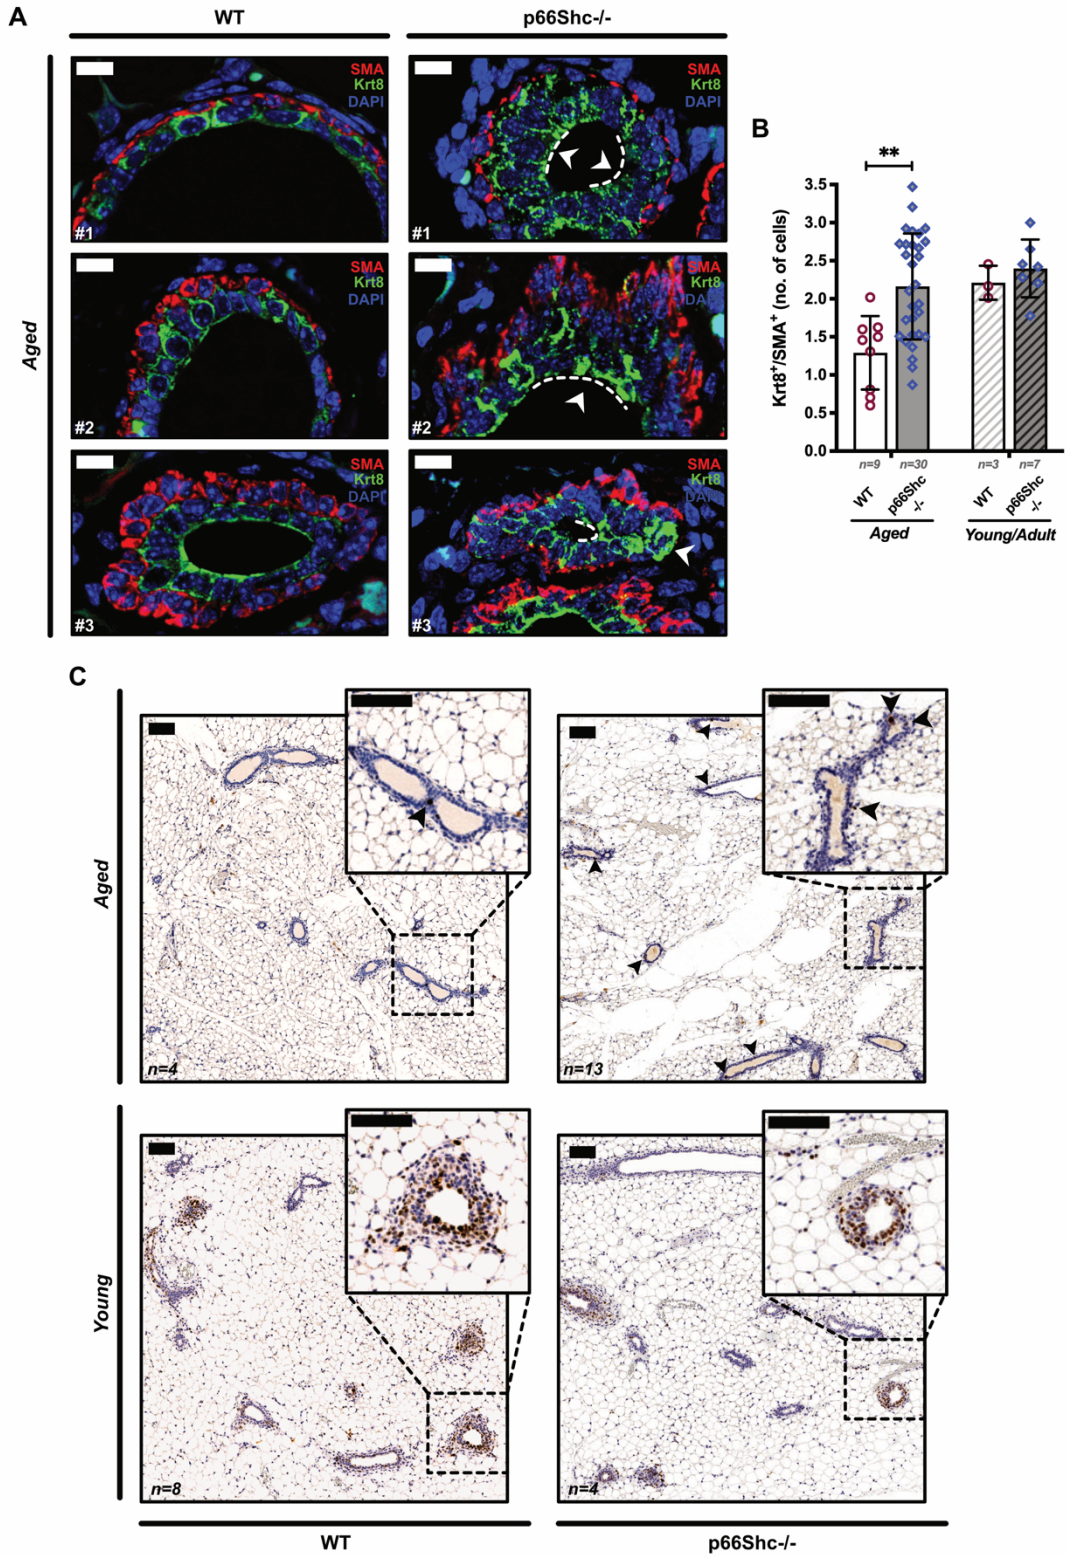

**Figure S1. Increased proliferation of ductal luminal epithelium in aged p66Shc<sup>-/-</sup> mammary glands (MGs).** (A) Representative confocal images of immunofluorescence analysis of basal (SMA<sup>+</sup>, red) and luminal (Krt8<sup>+</sup>, green) epithelia in aged WT (*n*=3) or p66Shc<sup>-/-</sup> (*n*=5) MGs (same experiment as in Figure 2D). White arrow-heads and dashed lines indicate areas of luminal hyperplasia. Nuclei are stained by DAPI (blue). Scale bar=10μm. (B) Quantification of increased cellularity within the luminal epithelium in aged p66Shc<sup>-/-</sup> MGs, expressed as the ratio of Krt8<sup>+</sup>-cells to SMA<sup>+</sup>-cells (same experiment as in A and Figure 2D). Numbers of analyzed ducts/lobules are indicated. Data are analyzed by 2-way ANOVA and Tukey *post-hoc* test; \*\*: *P*=0.0028. (C) Representative images of Ki67 immunohistochemistry analysis in MGs from aged (24-mo-old) WT (*n*=4) or p66Shc<sup>-/-</sup> (*n*=13) and young (2-mo-old) WT (*n*=8) or p66Shc<sup>-/-</sup> (*n*=4) mice (same experiment as in Figure 2E). Scale bar=100μm; arrow-heads: Ki67<sup>+</sup>-cells. In each panel, the area marked by the black dashed line is shown at higher magnification.

Figure S2

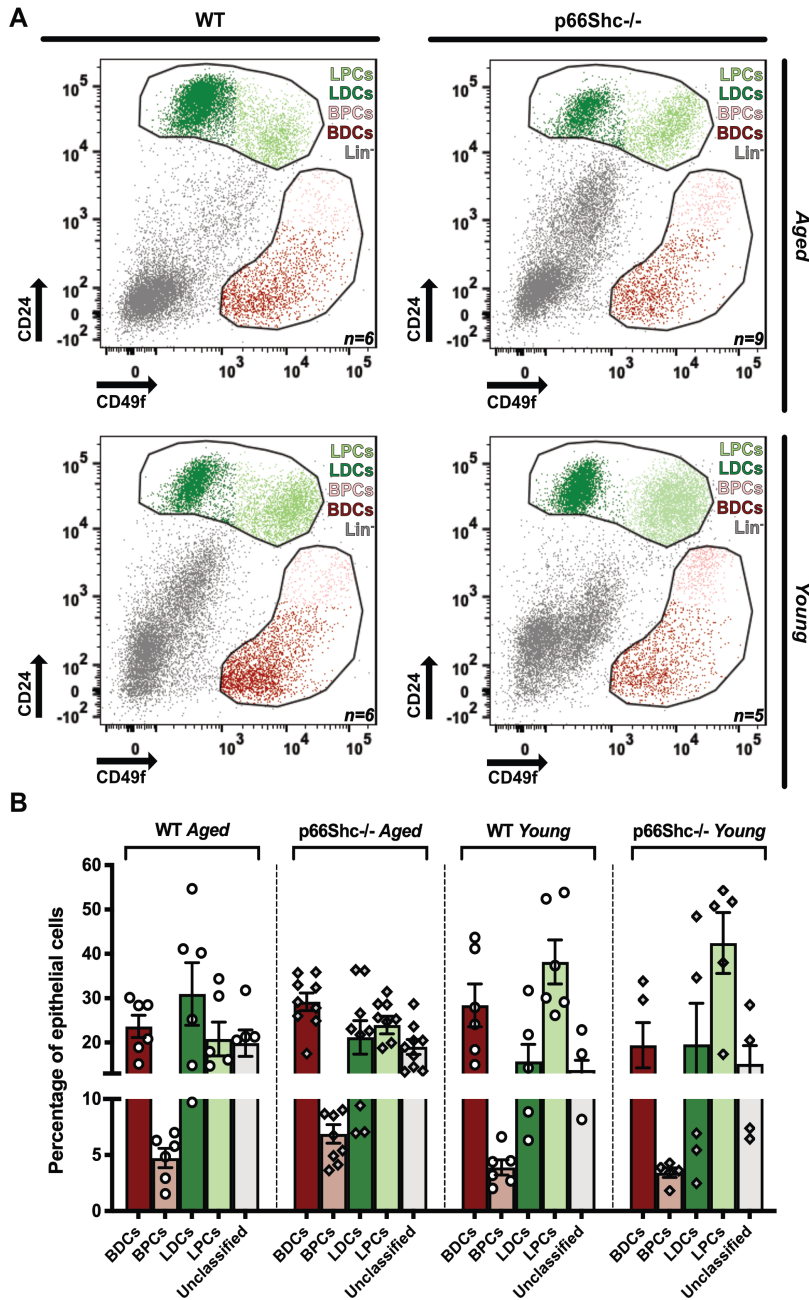

**Figure S2. Similar frequencies of basal and luminal progenitor cells in aged vs young WT or p66Shc<sup>-/-</sup> mammary glands (MGs).** (A) Representative dot-plots obtained by FACS-analysis of primary mammary epithelial cells from aged WT ( $n=6$ ) or p66Shc<sup>-/-</sup> ( $n=9$ ) and young WT ( $n=6$ ) or p66Shc<sup>-/-</sup> ( $n=5$ ) mice. Lin<sup>-</sup> cells (gray) are gated as follows: CD24<sup>hi</sup>CD49f<sup>med</sup>: luminal progenitors (LPCs, light green); CD24<sup>hi</sup>CD49f<sup>lo/neg</sup>: luminal differentiated cells (LDCs, dark green); CD24<sup>med</sup>CD49f<sup>hi</sup>: basal progenitors (BPCs, light red); CD49f<sup>med/hi</sup>CD24<sup>lo/neg</sup>: basal differentiated cells (BDCs, dark red). (B) Percentages of epithelial cell-subpopulations depicted in (A). Epithelial cells not assigned to any category are shown in gray (Unclassified). Data are represented as mean $\pm$ SEM. 2-way ANOVA reveals no significant difference between ages or genotype.

Figure S3

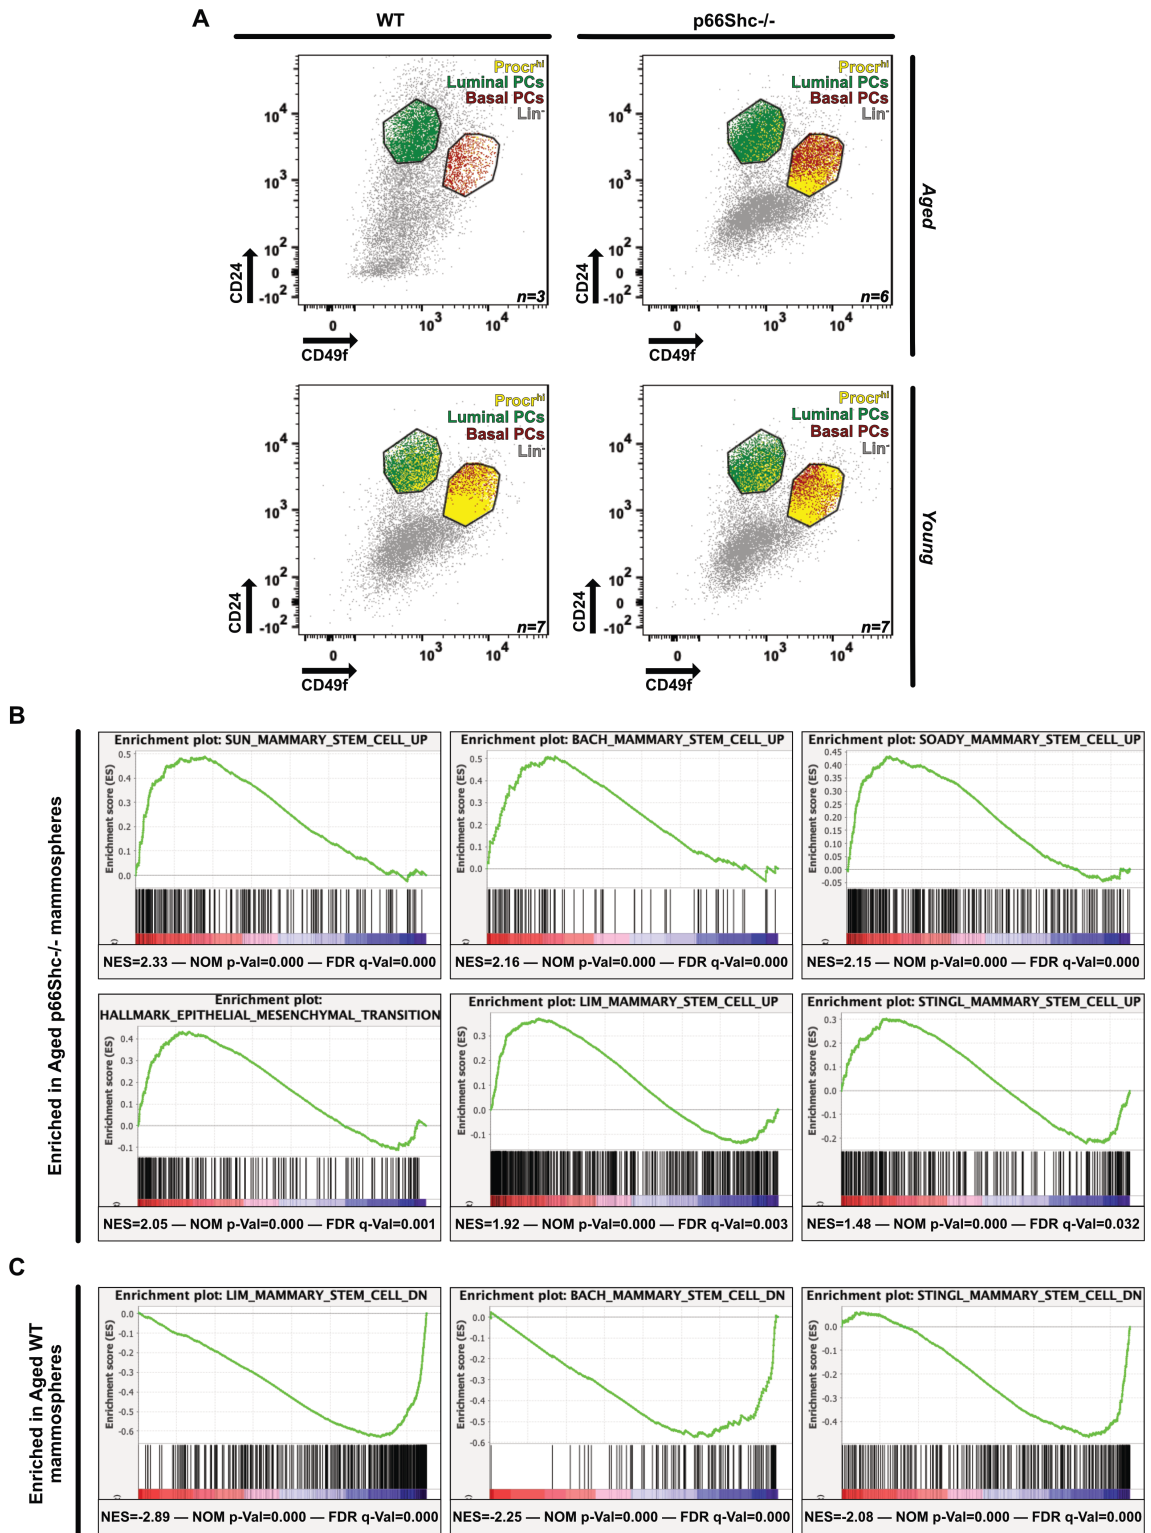

**Figure S3. Increased expression of mammary stem cell (MaSC) markers in aged p66Shc<sup>-/-</sup> mammospheres.** (A) Representative dot-plots obtained by FACS-analysis of M2-mammosphere cell suspensions from aged or young WT or p66Shc<sup>-/-</sup> mice (same experiment as in Figure 3A). Numbers of independent preparations are indicated. Lin<sup>-</sup> cells (gray) are gated as follows: CD24<sup>hi</sup>CD49f<sup>med</sup>: luminal progenitors (Luminal PCs, green) and CD24<sup>med</sup>CD49f<sup>hi</sup>: basal progenitors (Basal PCs, red); Procr<sup>hi</sup>-subpopulations are depicted in yellow. (B,C) Enrichment plots obtained by Gene Set Enrichment Analysis (30) of aged p66Shc<sup>-/-</sup> vs WT mammospheres, analyzed by bulk RNA-sequencing. Raw expression levels were compared for enrichment in gene sets-listed in Dataset 1 (same experiment as in Figure 3C-D). Top-enriched, MaSC-related datasets in aged p66Shc<sup>-/-</sup> (B) or WT (C) mammospheres are shown. Normalized enrichment scores (NES), nominal *P* values (NOM p-Val) and false discovery rates (FDR q-Val) are indicated.

Figure S4

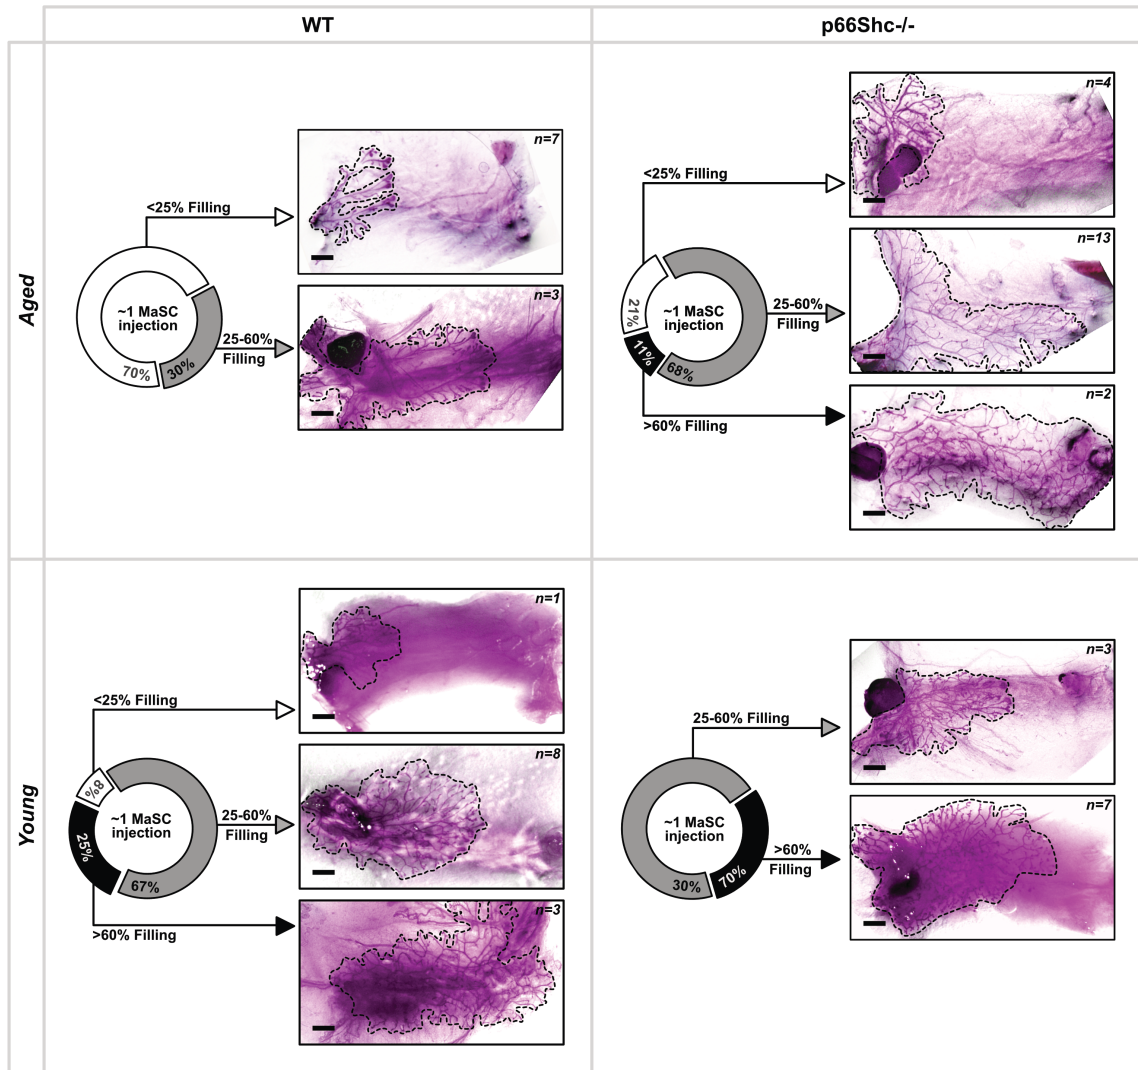

**Figure S4. Increased regenerative potential of aged p66Shc<sup>-/-</sup> MaSCs.** Representative carmine-stained whole-mount images of outgrowths obtained upon heterochronic transplantation of rate-limiting diluted M2-mammosphere cell suspensions from aged and young, WT or p66Shc<sup>-/-</sup> mice, into the cleared fat-pads of syngeneic 3-week-old mice. Outgrowths obtained with ~1 MaSC were categorized as filling <25%, 25%-60% or >60% of recipient's fat-pad area. Examples for each category are shown, together with donut-charts depicting percentages of outgrowths obtained for each category. Outgrowths are outlined. Scale bar: 1mm.

## Figure S5

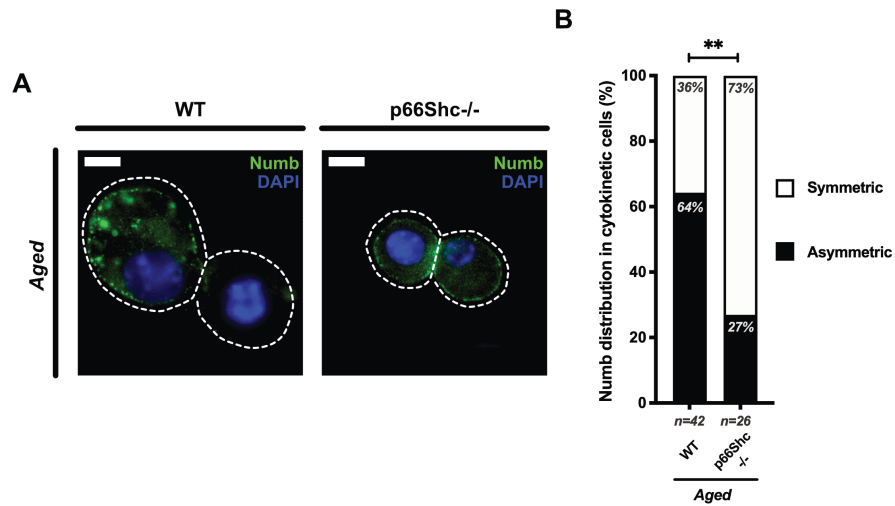

**Figure S5. Increased symmetric distribution of Numb in aged *p66Shc*<sup>-/-</sup> mammospheres. (A)** Numb distribution in cytokinetic cell-doublets, obtained after plating single-cell suspensions of M2-mammospheres from aged WT or *p66Shc*<sup>-/-</sup> mice ( $n \geq 3$  for each preparation). Numb (green) is either asymmetrically or symmetrically distributed. Cells and cleavage sites are outlined. Nuclei are shown by DAPI (blue). Scale bar=10 $\mu$ m. **(B)** Frequencies of either asymmetrical (black) or symmetrical (white) distribution of Numb in cytokinetic cell-doublets. Numbers of scored doublets are indicated. Statistical analysis: Chi-square test with Yates' correction. \*\*:  $P=0.006$ .



Figure S6

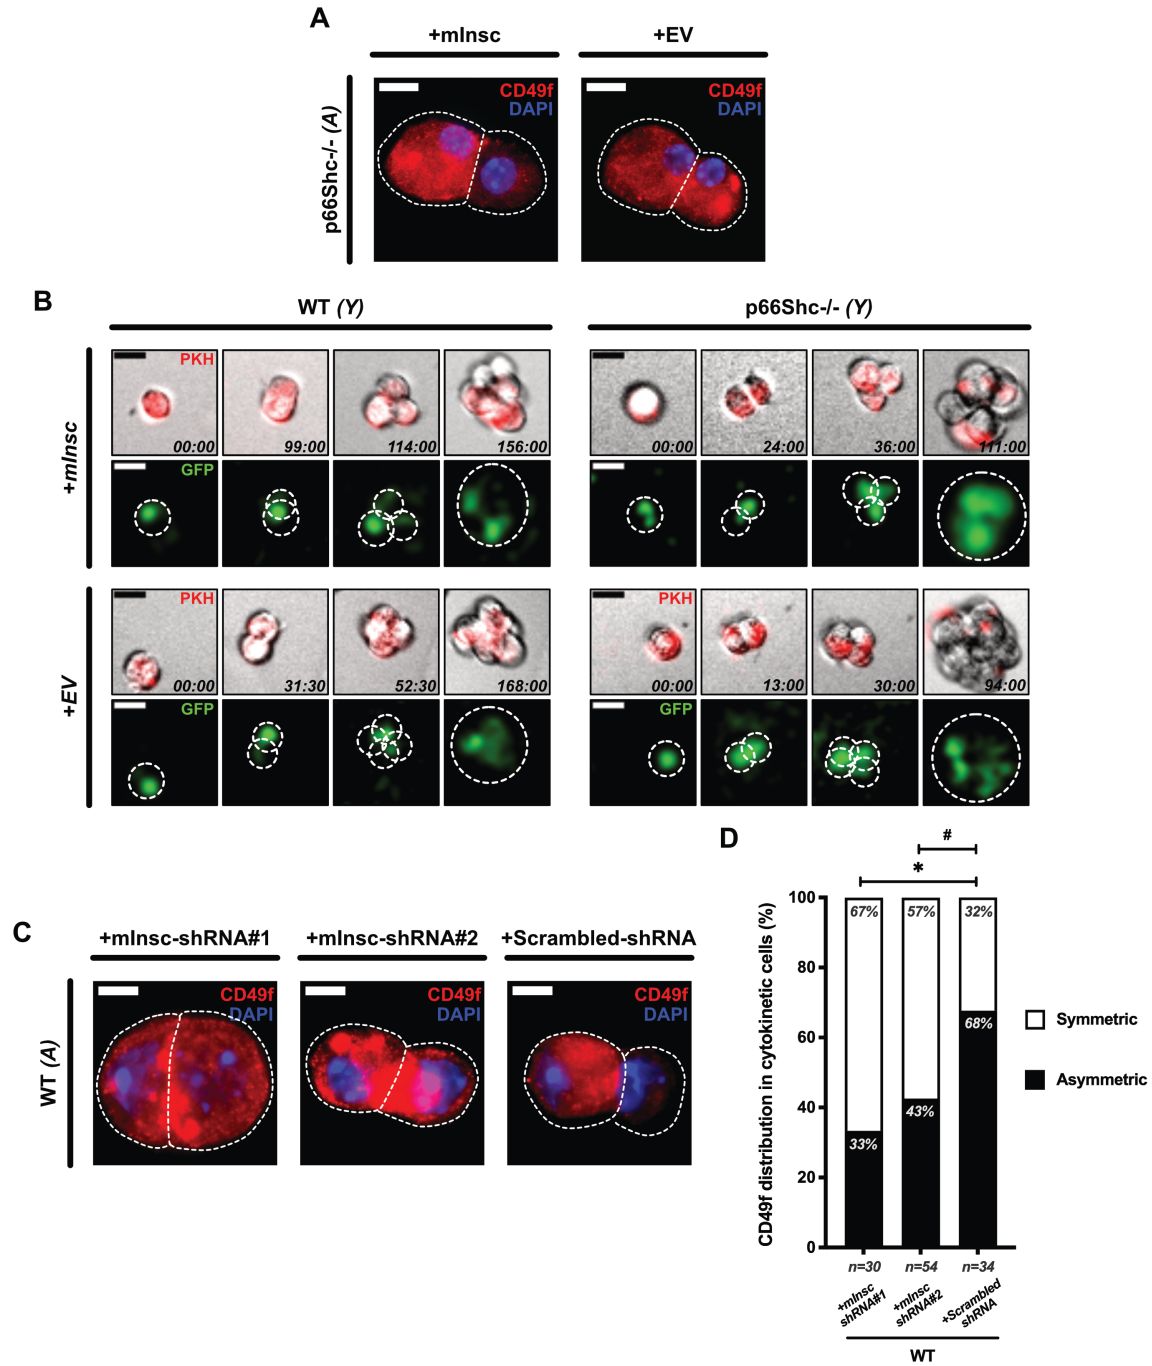

**Figure S6. mlnsc-overexpression restores asymmetric divisions of p66Shc<sup>-/-</sup> mammary stem cells (MaSCs), while mlnsc-knockdown prevents asymmetric divisions of aged WT MaSCs.** (A,C) CD49f distribution in cytokinetic cell-doublets obtained after plating single-cell suspensions of M2-mammospheres from aged p66Shc<sup>-/-</sup> (A) mice or aged WT (C) mice ( $n \geq 3$  for each preparation). In A, cells were infected with either mlnsc-overexpressing- (+mlnsc) or empty- (+EV) lentiviral vectors. In C, cells were infected with two anti-mlnsc shRNA vectors (+mlnsc-shRNA#1 and -#2) or control-vector (+Scrambled-shRNA). In both A and C, CD49f (red) is either

asymmetrically or symmetrically distributed. Cells and cleavage sites are outlined. Nuclei are shown by DAPI (blue). Scale bar=10 $\mu$ m. **(B)** Time-lapse microscopy of PKH<sup>+</sup>GFP<sup>+</sup>-cells from M2-mammosphere cell suspensions. Mammospheres from aged and young WT or p66Shc<sup>-/-</sup> mice ( $n \geq 3$  for each preparation) were infected with either mlncs-overexpressing- (+*mlncs*) or empty- (+EV) vectors. Early and late time-points are shown. Shooting-times are indicated as *hours:minutes*. Cells and spheroids are outlined. Scale bar=20 $\mu$ m. **(D)** Frequencies of either asymmetrical (black) or symmetrical (white) CD49f distribution in mlncs-knocked down aged WT MaSCs (same experiment as in C). Numbers of scored cell-doublets are indicated. Statistical analysis: pairwise Chi-square test with Yates' correction. \*:  $P=0.013$ ; #:  $P=0.038$ .

## Figure S7

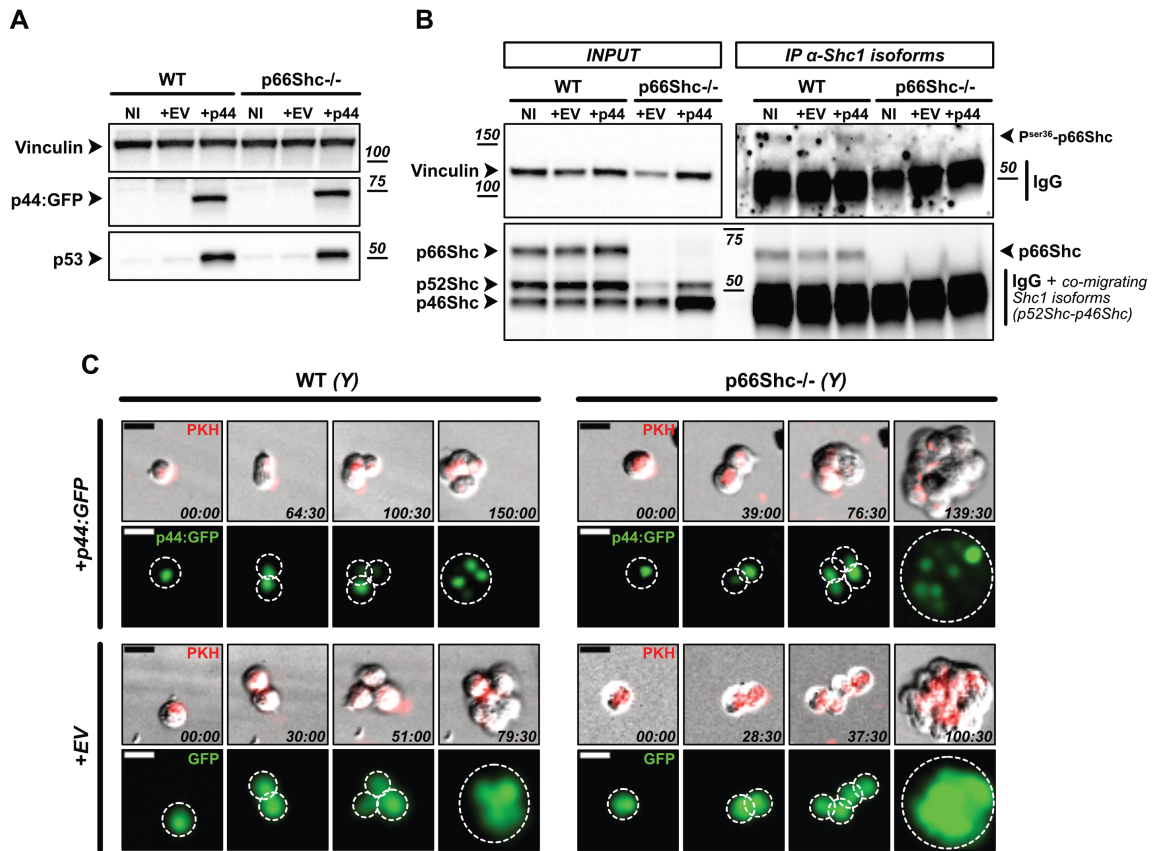

**Figure S7. p44 stabilizes p53, activates p66Shc, induces asymmetric division and decreases proliferation of mammary stem cells (MaSCs).** (A) Western blot (WB) on not-infected (NI), control-infected (+EV) and p44:GFP-infected (+p44) WT and p66Shc<sup>-/-</sup> primary mammary epithelial cells. p66Shc-independent expression of p44:GFP fusion protein (middle panel) and p53 stabilization in p44:GFP-infected cells (lower panel) are readily detectable. Vinculin is used as a loading control. (B) WB of input (left) and immunoprecipitated (IP, right) lysates from not-infected (NI), control-infected (+EV) and p44:GFP-infected (+p44) WT and p66Shc<sup>-/-</sup> primary mammary epithelial cells. Immunoprecipitation was performed with an anti-Shc1 antibody, which binds to all the Shc1 isoforms (p66Shc, p52Shc and p46Shc, as indicated in the input). WB of IPs shows modest activation of p66Shc (P<sup>ser36</sup>-p66Shc, upper-right panel) upon p44:GFP-overexpression. Vinculin is used as a loading control. (C) Time-lapse microscopy of PKH<sup>+</sup>GFP<sup>+</sup>-cells from M2-mammosphere cell suspensions. Mammospheres from young WT or p66Shc<sup>-/-</sup> mice ( $n \geq 3$  mice for each preparation) were infected with either p44:GFP-expressing- (+p44:GFP) or empty- (+EV) vectors. Early and late time-points are shown. Shooting-times are indicated as *hours:minutes*. Cells and spheroids are outlined. Note nuclear localization of p44:GFP. Scale bar=20 $\mu$ m.

## Supplementary Tables

Table S1

|                              | No. of transplanted cells (experimental) | No. of MaSCs (inferred)      | Aged donors                                                           |                                         |           |           |          |           |           |
|------------------------------|------------------------------------------|------------------------------|-----------------------------------------------------------------------|-----------------------------------------|-----------|-----------|----------|-----------|-----------|
|                              |                                          |                              | No. of injected mice                                                  | Outgrowth extension (% of fat pad area) |           |           |          |           | Total     |
|                              |                                          |                              |                                                                       | 100-81                                  | 80-61     | 60-41     | 40-26    | 26-15     |           |
| WT donors                    | 50 000                                   | 100 $\approx$ n $\approx$ 30 | 9                                                                     | 0                                       | 1         | 4         | 2        | 2         | 9         |
|                              | 5 000                                    | 10 $\approx$ n $\approx$ 3   | 10                                                                    | 0                                       | 1         | 5         | 1        | 3         | 10        |
|                              | 2 000                                    | 3 $\approx$ n $\approx$ 1    | 3                                                                     | 0                                       | 0         | 0         | 0        | 2         | 2         |
|                              | 1 000                                    | n $\approx$ 1                | 3                                                                     | 0                                       | 0         | 0         | 0        | 1         | 1         |
|                              | 500                                      | n $\approx$ 1                | 21                                                                    | 0                                       | 0         | 1         | 2        | 2         | 5         |
|                              | 100                                      | n $\approx$ 1                | 11                                                                    | 0                                       | 0         | 0         | 0        | 2         | 2         |
|                              | 50                                       | n $\approx$ 1                | 10                                                                    | 0                                       | 0         | 0         | 0        | 0         | 0         |
|                              | 25                                       | n $\approx$ 1                | 10                                                                    | 0                                       | 0         | 0         | 0        | 0         | 0         |
|                              | <b>Total</b>                             |                              | <b>77</b>                                                             | <b>0</b>                                | <b>2</b>  | <b>10</b> | <b>5</b> | <b>12</b> | <b>29</b> |
|                              |                                          |                              | <b>Estimated MaSC frequency for Aged WT = 1:1 507</b>                 |                                         |           |           |          |           |           |
|                              |                                          |                              | Limits: lower = 1:2 520 - upper = 1:901                               |                                         |           |           |          |           |           |
| p66Shc <sup>-/-</sup> donors | 50 000                                   | 100 $\approx$ n $\approx$ 30 | 9                                                                     | 4                                       | 1         | 3         | 1        | 0         | 9         |
|                              | 5 000                                    | 10 $\approx$ n $\approx$ 3   | 8                                                                     | 4                                       | 1         | 2         | 1        | 0         | 8         |
|                              | 2 000                                    | 3 $\approx$ n $\approx$ 1    | 4                                                                     | 0                                       | 0         | 2         | 0        | 2         | 4         |
|                              | 1 000                                    | n $\approx$ 1                | 3                                                                     | 0                                       | 0         | 1         | 0        | 1         | 2         |
|                              | 500                                      | n $\approx$ 1                | 20                                                                    | 0                                       | 1         | 2         | 3        | 2         | 8         |
|                              | 100                                      | n $\approx$ 1                | 15                                                                    | 0                                       | 1         | 3         | 3        | 0         | 7         |
|                              | 50                                       | n $\approx$ 1                | 10                                                                    | 0                                       | 0         | 1         | 0        | 1         | 2         |
|                              | 25                                       | n $\approx$ 1                | 8                                                                     | 0                                       | 0         | 0         | 0        | 0         | 0         |
|                              | <b>Total</b>                             |                              | <b>77</b>                                                             | <b>8</b>                                | <b>4</b>  | <b>14</b> | <b>8</b> | <b>6</b>  | <b>40</b> |
|                              |                                          |                              | <b>Estimated MaSC frequency for Aged p66Shc<sup>-/-</sup> = 1:577</b> |                                         |           |           |          |           |           |
|                              |                                          |                              | Limits: lower = 1:916 - upper = 1:364                                 |                                         |           |           |          |           |           |
|                              | No. of transplanted cells (experimental) | No. of MaSCs (inferred)      | Young donors                                                          |                                         |           |           |          |           |           |
|                              |                                          |                              | No. of injected mice                                                  | Outgrowth extension (% of fat pad area) |           |           |          |           | Total     |
|                              |                                          |                              |                                                                       | 100-81                                  | 80-61     | 60-41     | 40-26    | 26-15     |           |
| WT donors                    | 50 000                                   | 100 $\approx$ n $\approx$ 30 | 16                                                                    | 1                                       | 3         | 9         | 3        | 0         | 16        |
|                              | 5 000                                    | 10 $\approx$ n $\approx$ 3   | 12                                                                    | 0                                       | 5         | 4         | 2        | 1         | 12        |
|                              | 500                                      | n $\approx$ 1                | 14                                                                    | 0                                       | 3         | 2         | 2        | 0         | 7         |
|                              | 100                                      | n $\approx$ 1                | 10                                                                    | 0                                       | 0         | 0         | 4        | 1         | 5         |
|                              | 50                                       | n $\approx$ 1                | 6                                                                     | 0                                       | 0         | 0         | 0        | 0         | 0         |
|                              | 25                                       | n $\approx$ 1                | 6                                                                     | 0                                       | 0         | 0         | 0        | 0         | 0         |
| <b>Total</b>                 |                                          | <b>64</b>                    | <b>1</b>                                                              | <b>11</b>                               | <b>15</b> | <b>11</b> | <b>2</b> | <b>40</b> |           |
|                              |                                          |                              | <b>Estimated SC frequency for Young WT = 1:514</b>                    |                                         |           |           |          |           |           |
|                              |                                          |                              | Limits: lower = 1:934 - upper = 1:283                                 |                                         |           |           |          |           |           |
| p66Shc <sup>-/-</sup> donors | 50 000                                   | 100 $\approx$ n $\approx$ 30 | 8                                                                     | 2                                       | 2         | 3         | 1        | 0         | 8         |
|                              | 5 000                                    | 10 $\approx$ n $\approx$ 3   | 4                                                                     | 0                                       | 2         | 2         | 0        | 0         | 4         |
|                              | 500                                      | n $\approx$ 1                | 8                                                                     | 1                                       | 0         | 3         | 0        | 0         | 4         |
|                              | 100                                      | n $\approx$ 1                | 8                                                                     | 0                                       | 0         | 4         | 0        | 0         | 4         |
|                              | 50                                       | n $\approx$ 1                | 8                                                                     | 1                                       | 1         | 0         | 0        | 0         | 2         |
|                              | 25                                       | n $\approx$ 1                | 8                                                                     | 0                                       | 0         | 0         | 0        | 0         | 0         |
| <b>Total</b>                 |                                          | <b>44</b>                    | <b>4</b>                                                              | <b>5</b>                                | <b>12</b> | <b>1</b>  | <b>0</b> | <b>22</b> |           |
|                              |                                          |                              | <b>Estimated SC frequency for Young p66Shc<sup>-/-</sup> = 1:393</b>  |                                         |           |           |          |           |           |
|                              |                                          |                              | Limits: lower = 1:778 - upper = 1:200                                 |                                         |           |           |          |           |           |

**Table S1. Increased number of mammary stem cells (MaSCs) in mammospheres from aged p66Shc<sup>-/-</sup> mice.** Limiting-dilution heterochronic transplantation of M2-mammosphere cell suspensions from aged and young, WT or p66Shc<sup>-/-</sup> mice, into the cleared fat-pads of 3-week-old syngeneic recipients. Recipient mice were categorized by outgrowth extension, calculated as percentage of repopulated fat-pad area. Outgrowths filling less than 15% were considered as unsuccessful engraftments. Numbers of transplanted cells, inferred numbers of transplanted MaSCs (=no. of transplanted cells/estimated MaSC frequency), numbers of injected mice and obtained outgrowths are indicated, as well as estimated MaSC frequencies and confidence intervals. MaSC frequencies and statistical differences between groups were calculated pairwise with ELDA (63):  $P=0.006$  for Aged WT vs Aged p66Shc<sup>-/-</sup> groups;  $P=0.009$  for Aged WT vs Young WT groups; other comparisons yielded not significant results.

Table S2

| Modality of division |                               | Dividing PKH <sup>+</sup> /GFP <sup>+</sup> cells |           |           |           |           |                          |           |           |           |                             |
|----------------------|-------------------------------|---------------------------------------------------|-----------|-----------|-----------|-----------|--------------------------|-----------|-----------|-----------|-----------------------------|
|                      |                               | Asymmetric cell divisions                         |           |           |           |           | Symmetric cell divisions |           |           |           | Total no. of observed cells |
|                      |                               | Rounds of division                                | 2         | 3         | >3        | Total ACD | 2                        | 3         | >3        | Total SCD |                             |
| Aged                 | WT +EV                        | No. of cells                                      | 48        | 47        | 6         | 101       | 16                       | 8         | 1         | 25        | 126                         |
|                      |                               | %                                                 | <b>48</b> | <b>47</b> | <b>6</b>  |           | <b>64</b>                | <b>32</b> | <b>4</b>  |           |                             |
|                      | p66Shc <sup>-/-</sup> +EV     | No. of cells                                      | 12        | 11        | 10        | 33        | 8                        | 14        | 11        | 33        | 66                          |
|                      |                               | %                                                 | <b>36</b> | <b>33</b> | <b>30</b> |           | <b>24</b>                | <b>42</b> | <b>33</b> |           |                             |
| Young                | WT +EV                        | No. of cells                                      | 56        | 59        | 19        | 134       | 40                       | 41        | 20        | 101       | 235                         |
|                      |                               | %                                                 | <b>42</b> | <b>44</b> | <b>14</b> |           | <b>40</b>                | <b>41</b> | <b>20</b> |           |                             |
|                      | p66Shc <sup>-/-</sup> +EV     | No. of cells                                      | 40        | 43        | 14        | 97        | 25                       | 64        | 40        | 129       | 226                         |
|                      |                               | %                                                 | <b>41</b> | <b>44</b> | <b>14</b> |           | <b>19</b>                | <b>50</b> | <b>31</b> |           |                             |
|                      | p66Shc <sup>-/-</sup> +p66Shc | No. of cells                                      | 48        | 32        | 6         | 86        | 10                       | 20        | 2         | 32        | 118                         |
|                      |                               | %                                                 | <b>56</b> | <b>37</b> | <b>7</b>  |           | <b>31</b>                | <b>63</b> | <b>6</b>  |           |                             |

**Table S2. p66Shc<sup>-/-</sup> deletion promotes mammary stem cell (MaSC) proliferation, regardless of their modality of division.** PKH<sup>+</sup>GFP<sup>+</sup>-M2-mammosphere cells from young and aged, WT or p66Shc<sup>-/-</sup> mice were observed by 7-day time-lapse imaging to score asymmetric vs symmetric divisions and rounds of divisions entered. MaSCs were categorized according to their modality of division (ACD or SCD) and sub-categorized by rounds of division entered (2, 3 or >3). Numbers and percentages of cells are indicated for each group. For “Aged WT +EV”, “Aged p66Shc<sup>-/-</sup> +EV” and “Young p66Shc<sup>-/-</sup> +p66Shc” groups, MaSCs were the same of experiments depicted in Fig. 5C-E. For “Young WT +EV” and “Young p66Shc<sup>-/-</sup> +EV” groups, MaSCs were pooled from experiments depicted in Figures 5C-E and 7A,C. Chi-square test reveals no significant difference between asymmetrically- and symmetrically- dividing MaSCs in rounds of division entered.

**Table S3**

| Gene symbol    | Category            | Aged   |         |   |                       |         |   | Young |         |   |                       |         |   |
|----------------|---------------------|--------|---------|---|-----------------------|---------|---|-------|---------|---|-----------------------|---------|---|
|                |                     | WT     |         |   | p66Shc <sup>-/-</sup> |         |   | WT    |         |   | p66Shc <sup>-/-</sup> |         |   |
|                |                     | FC     | SEM(FC) | N | FC                    | SEM(FC) | N | FC    | SEM(FC) | N | FC                    | SEM(FC) | N |
| Aldh1a1        | MaSC marker         | -1.607 | 0.043   | 3 | 1.195                 | 0.416   | 3 | 1.000 | 0.047   | 6 | -1.098                | 0.182   | 8 |
| Anapc5         | Cell cycle          | -1.362 | 0.025   | 3 | 1.145                 | 0.162   | 3 | 1.000 | 0.116   | 3 | 1.234                 | 0.126   | 3 |
| Anln           | Cell cycle          | -3.159 | 0.113   | 3 | -2.861                | 0.078   | 3 | 1.000 | 0.005   | 3 | -1.008                | 0.081   | 3 |
| Aurka          | Cell cycle/polarity | -2.361 | 0.057   | 3 | -3.746                | 0.043   | 3 | 1.000 | 0.047   | 3 | 1.054                 | 0.268   | 3 |
| Aurkb          | Cell cycle/polarity | -2.758 | 0.008   | 3 | -2.928                | 0.033   | 3 | 1.000 | 0.009   | 3 | 1.001                 | 0.234   | 3 |
| Bub1           | Cell cycle          | -3.196 | 0.023   | 3 | -1.880                | 0.064   | 3 | 1.000 | 0.014   | 3 | 1.148                 | 0.151   | 3 |
| Bub1b          | Cell cycle          | -2.687 | 0.142   | 3 | -2.827                | 0.040   | 3 | 1.000 | 0.266   | 3 | 1.061                 | 0.223   | 3 |
| Bub3           | Cell cycle          | -1.893 | 0.050   | 3 | -1.365                | 0.097   | 3 | 1.000 | 0.231   | 3 | -1.427                | 0.082   | 3 |
| Ccna2          | Cell cycle          | -6.404 | 0.017   | 3 | -2.910                | 0.042   | 3 | 1.000 | 0.129   | 3 | -1.049                | 0.257   | 3 |
| Ccnb1          | Cell cycle          | -3.152 | 0.028   | 3 | -3.040                | 0.049   | 3 | 1.000 | 0.073   | 3 | 1.017                 | 0.141   | 3 |
| Ccnb2          | Cell cycle          | -2.327 | 0.060   | 3 | -3.156                | 0.044   | 3 | 1.000 | 0.021   | 3 | -1.114                | 0.197   | 3 |
| Ccnf           | Cell cycle          | -2.328 | 0.010   | 3 | -4.274                | 0.018   | 3 | 1.000 | 0.012   | 3 | -1.037                | 0.176   | 3 |
| Cdc20          | Cell cycle          | -2.516 | 0.072   | 3 | -4.350                | 0.047   | 3 | 1.000 | 0.026   | 3 | 1.353                 | 0.196   | 3 |
| Cdca2          | Cell cycle          | -2.708 | 0.044   | 3 | -3.478                | 0.022   | 3 | 1.000 | 0.140   | 3 | -1.075                | 0.106   | 3 |
| Cdk1           | Cell cycle          | -3.962 | 0.117   | 3 | -2.037                | 0.117   | 3 | 1.000 | 0.174   | 3 | 1.258                 | 0.356   | 3 |
| Cdk2           | Cell cycle          | -1.309 | 0.063   | 3 | -1.736                | 0.013   | 3 | 1.000 | 0.098   | 3 | -1.214                | 0.065   | 3 |
| Cenpe          | Cell cycle          | -2.793 | 0.061   | 3 | -2.797                | 0.036   | 3 | 1.000 | 0.011   | 3 | 1.101                 | 0.141   | 3 |
| Chek1          | Cell cycle          | -2.391 | 0.032   | 3 | -1.629                | 0.059   | 3 | 1.000 | 0.009   | 3 | 1.004                 | 0.087   | 3 |
| Haus2          | Cell cycle          | 1.024  | 0.033   | 3 | 1.126                 | 0.236   | 3 | 1.000 | 0.072   | 3 | 1.381                 | 0.473   | 3 |
| Incenp         | Cell cycle          | -2.059 | 0.016   | 3 | -1.725                | 0.053   | 3 | 1.000 | 0.019   | 3 | -1.010                | 0.128   | 3 |
| Kif20a         | Cell cycle          | -2.517 | 0.051   | 3 | -3.460                | 0.086   | 3 | 1.000 | 0.121   | 3 | 1.168                 | 0.214   | 3 |
| Kif2c          | Cell cycle          | -2.807 | 0.011   | 3 | -4.617                | 0.033   | 3 | 1.000 | 0.034   | 3 | -1.446                | 0.020   | 3 |
| LGN (Gpsm2)    | Cell polarity       | -1.558 | 0.048   | 3 | -1.538                | 0.047   | 3 | 1.000 | 0.234   | 3 | 1.100                 | 0.079   | 3 |
| Mad2l1         | Cell cycle          | -2.295 | 0.093   | 3 | -2.623                | 0.044   | 3 | 1.000 | 0.086   | 3 | -1.081                | 0.044   | 3 |
| mlnsc (Insc)   | Cell polarity       | 1.074  | 0.129   | 3 | -5.355                | 0.082   | 3 | 1.000 | 0.184   | 6 | -1.195                | 0.165   | 8 |
| Mis12          | Cell cycle          | -2.831 | 0.046   | 3 | -1.526                | 0.091   | 3 | 1.000 | 0.606   | 3 | -1.398                | 0.027   | 3 |
| Mphosph8       | Cell cycle          | -1.157 | 0.072   | 3 | -1.511                | 0.017   | 3 | 1.000 | 0.152   | 3 | -1.288                | 0.078   | 3 |
| Ncapd2         | Cell cycle          | -2.314 | 0.024   | 3 | -3.037                | 0.087   | 3 | 1.000 | 0.157   | 3 | -1.141                | 0.145   | 3 |
| NuMA (Numa1)   | Cell polarity       | 1.430  | 0.113   | 3 | 1.404                 | 0.402   | 3 | 1.000 | 0.121   | 3 | 1.402                 | 0.151   | 3 |
| Numb           | Cell polarity       | 1.581  | 0.123   | 3 | 1.089                 | 0.134   | 3 | 1.000 | 0.030   | 3 | -1.241                | 0.183   | 3 |
| Par3 (Pard3)   | Cell polarity       | 1.361  | 0.164   | 3 | 1.258                 | 0.078   | 3 | 1.000 | 0.004   | 3 | -1.329                | 0.115   | 3 |
| Par6 (Pard6a)  | Cell polarity       | 1.435  | 0.142   | 3 | -1.607                | 0.121   | 3 | 1.000 | 0.221   | 6 | -1.776                | 0.141   | 6 |
| Plk1           | Cell cycle/polarity | -2.603 | 0.029   | 3 | -3.483                | 0.068   | 3 | 1.000 | 0.167   | 3 | 1.208                 | 0.164   | 3 |
| Plk4           | Cell cycle/polarity | -1.946 | 0.033   | 3 | -1.312                | 0.068   | 3 | 1.000 | 0.088   | 3 | 1.173                 | 0.170   | 3 |
| Smc4           | Cell cycle          | -1.490 | 0.024   | 3 | -1.967                | 0.068   | 3 | 1.000 | 0.063   | 3 | -1.402                | 0.075   | 3 |
| Spag5 (Astrin) | Cell cycle          | -2.964 | 0.020   | 3 | -3.361                | 0.055   | 3 | 1.000 | 0.039   | 3 | 1.042                 | 0.048   | 3 |
| Top2a          | Cell cycle          | -2.330 | 0.085   | 3 | -2.844                | 0.034   | 3 | 1.000 | 0.191   | 3 | -1.282                | 0.141   | 3 |

**Table S3. qRT-PCR expression levels of genes analyzed in the present study.** Mean qRT-PCR expression levels are shown as fold-changes (FCs) over “young WT” values, used as calibrators.  $0 < \text{FCs} < 1$  are expressed as  $-1/\text{FC}$  (negative FCs). SEM (standard error of the mean) and N (sample size) are indicated.

**Table S4**

| Antibody                                                                            | Source                                                 | Identifier           | Working dilution | Application                          |
|-------------------------------------------------------------------------------------|--------------------------------------------------------|----------------------|------------------|--------------------------------------|
| Mouse monoclonal <b>anti-(<math>\alpha</math>-Smooth-Muscle Actin)</b> , clone 1A4  | Agilent Technologies, Santa Clara, CA, USA             | Cat#M0851            | 1:150            | Immunofluorescence on FFPE tissues   |
| Rabbit polyclonal <b>anti-(Cytokeratin-8)</b>                                       | Abcam, Cambridge, Cambs, UK                            | Cat#ab59400          | 1:200            | Immunofluorescence on FFPE tissues   |
| Rabbit monoclonal <b>anti-Ki67</b> , clone SP6                                      | Thermo Fisher Scientific, Waltham, MA, USA             | Cat#MA5-14520        | 1:200            | Immunohistochemistry on FFPE tissues |
| Rat monoclonal <b>anti-CD45</b> , clone 30-F11, PE-Cy7 conjugated                   | Thermo Fisher Scientific                               | Cat#25-0451-82       | 1:300            | Flow cytometry                       |
| Rat monoclonal <b>anti-CD31</b> (PECAM-1), clone 390, PE-Cy7 conjugated             | Thermo Fisher Scientific                               | Cat#25-0311-82       | 1:300            | Flow cytometry                       |
| Rat monoclonal <b>anti-(TER-119)</b> , clone TER-119, PE-Cy7 conjugated             | Thermo Fisher Scientific                               | Cat#25-5921-81       | 1:300            | Flow cytometry                       |
| Rat monoclonal <b>anti-CD24</b> , clone M1/69, PE-conjugated                        | Thermo Fisher Scientific                               | Cat#12-0242-82       | 1:200            | Flow cytometry                       |
| Rat monoclonal <b>anti-CD49f</b> (Integrin $\alpha$ 6), clone GoH3, FITC-conjugated | Thermo Fisher Scientific                               | Cat#11-0495-82       | 1:100            | Flow cytometry                       |
| Rat monoclonal <b>anti-CD49f</b> (Integrin $\alpha$ 6), clone GoH3, APC-conjugated  | Thermo Fisher Scientific                               | Cat#17-0495-82       | 1:100            | Flow cytometry                       |
| Rat monoclonal <b>anti-CD201 (EPCR)</b> , clone 1560, APC-conjugated                | Thermo Fisher Scientific                               | Cat#17-2012-82       | 1:100            | Flow cytometry                       |
| Rat monoclonal <b>anti-CD49f</b> (Integrin $\alpha$ 6), clone GoH3                  | BD Biosciences, Franklin Lakes, NJ, USA                | Cat#555734           | 1:200            | Immunocytofluorescence               |
| Mouse monoclonal <b>anti-Numb</b> , clone AB21                                      | Pier Paolo Di Fiore Lab; Colaluca <i>et al.</i> , 2008 | N/A                  | 1:1 000          | Immunocytofluorescence               |
| Mouse monoclonal <b>anti-p53</b> , clone 1C12                                       | Cell Signaling Technology (CST), Danvers, MA, USA      | Cat#2524             | 1:1 000          | Western blot                         |
| Rabbit polyclonal <b>anti-Shc1</b>                                                  | BD Biosciences                                         | Cat#610081           | 1:1 000          | Western blot, Immunoprecipitation    |
| Mouse monoclonal <b>anti-(phospho-Ser36-p66Shc)</b> , clone 6E10                    | Enzo Life Sciences, Farmingdale, NY, USA               | Cat#ALX-804-358-C100 | 1:200            | Western blot                         |
| Rabbit polyclonal <b>anti-GFP</b>                                                   | Abcam                                                  | Cat#ab290            | 1:1 000          | Western blot                         |
| Mouse monoclonal <b>anti-Vinculin</b> , clone hVin-1                                | Merck, Darmstadt, HE, Germany                          | Cat#V9131            | 1:20 000         | Western blot                         |
| Donkey polyclonal <b>anti-(Mouse-IgG)</b> , Cy3-conjugated                          | Jackson ImmunoResearch, West Grove, PA, USA            | Cat#715-165-150      | 1:400            | Immunofluorescence                   |
| Donkey polyclonal <b>anti-(Mouse-IgG)</b> , Alexa Fluor 488-conjugated              | Jackson ImmunoResearch                                 | Cat#715-545-150      | 1:400            | Immunofluorescence                   |
| Donkey polyclonal <b>anti-(Rabbit-IgG)</b> , Alexa Fluor 488-conjugated             | Jackson ImmunoResearch                                 | Cat#711-545-152      | 1:400            | Immunofluorescence                   |
| Donkey polyclonal <b>anti-(Rat-IgG)</b> , Cy3-conjugated                            | Jackson ImmunoResearch                                 | Cat#712-165-153      | 1:400            | Immunofluorescence                   |
| Goat polyclonal <b>anti-(Mouse-IgG)</b> , Hrp-conjugated                            | Bio-Rad Laboratories, Hercules, CA, USA                | Cat#5178-2504        | 1:20 000         | Western blot                         |
| Goat polyclonal <b>anti-(Rabbit-IgG)</b> , Hrp-conjugated                           | Bio-Rad Laboratories                                   | Cat#5196-2504        | 1:20 000         | Western blot                         |

**Table S4. List of antibodies used in the present study.** Host species, immunoreactive antigens, clone identifiers, commercial information, working dilutions and applications are listed for each of the antibodies used in this study.



**Table S5**

| <b>Instrument</b>                                                                                          | <b>Source</b>                                              | <b>Application</b>                                                     |
|------------------------------------------------------------------------------------------------------------|------------------------------------------------------------|------------------------------------------------------------------------|
| <b>SZX16</b> Stereomicroscope                                                                              | Olympus, Hamburg, HH, Germany                              | Whole-mount imaging (Fig. 1A-C, 4A and S4)                             |
| <b>Aperio ScanScope XT</b> equipped with a 20x/0.75NA dry objective                                        | Leica Biosystems, Nussloch, BW, Germany                    | FFPE tissue slide optical imaging (Fig. 2A-B and S1C)                  |
| <b>SP8</b> Confocal Microscope, equipped with a 40x/1.3NA immersion oil objective                          | Leica Microsystems, Wetzlar, HE, Germany                   | FFPE tissue slide fluorescence confocal imaging (Fig. 2D and S1A)      |
| <b>BX61</b> Upright Wide Field Microscope, equipped with a 100x/1.35NA immersion oil objective             | Olympus                                                    | Immunocytofluorescence imaging (Fig. 5A and S5)                        |
| <b>DM6-B</b> Microscope, equipped with a 63x/1.40NA or a 100x/1.40NA immersion oil objective               | Leica Microsystems                                         | Immunocytofluorescence imaging (Fig. S6A,C)                            |
| <b>IX81</b> Inverted Fluorescence Automated Live cell Microscope, equipped with a 10X/0.4NA dry objective  | Olympus                                                    | Time-lapse fluorescence imaging (Fig. 7D and S7C)                      |
| <b>IX81</b> Inverted Fluorescence Automated Live cell Microscope, equipped with a 20X/0.45NA dry objective | Olympus                                                    | Time-lapse fluorescence imaging (Fig. 5C and S6B)                      |
| <b>ECLIPSE Ti</b> Inverted Microscope System, equipped with 20x/0.75NA dry objective                       | Nikon, Tokyo, Japan                                        | Time-lapse fluorescence imaging (Fig. 5C and S6B)                      |
| <b>THUNDER</b> DMI8 Imager, equipped with a 20x/0.4NA dry objective                                        | Leica Microsystems                                         | Time-lapse fluorescence imaging (Fig. 5C and S6B)                      |
| DS-5Mc-U1 Digital Sight Camera                                                                             | Nikon                                                      | Equipped on SZX16 Stereomicroscope                                     |
| CoolSNAP EZ                                                                                                | Photometrics, Huntington Beach, CA, USA                    | Equipped on BX61 Upright Wide Field Microscope                         |
| Zyla 4.2 sCMOS                                                                                             | Andor Technology (Oxford Instruments), Belfast, Antrim, UK | Equipped on DM6-B Microscope and ECLIPSE Ti Inverted Microscope System |
| ORCA R-2 CCD Camera                                                                                        | Hamamatsu, Hamamatsu City, Japan                           | Equipped on IX81 Inverted Fluorescence Automated Live cell Microscope  |
| ORCA-AG                                                                                                    | Hamamatsu                                                  | Equipped on IX81 Inverted Fluorescence Automated Live cell Microscope  |
| DFC9000 GTC                                                                                                | Leica Microsystems                                         | Equipped on THUNDER DMI8 Imager                                        |
| Cage incubator for live cell imaging                                                                       | Oko-Lab, Ambridge, PA, USA                                 | Equipped on time-lapse microscopes                                     |

**Table S5. List of instruments used for image acquisition in the present study.** Microscopes, cameras, objectives with magnifications and numerical apertures, commercial information, applications and references to figures are indicated for each of the imaging instruments used in this study.

**Table S6**

| Gene symbol    | Gene name                                         | MGI ID  | TaqMan® assay ID |
|----------------|---------------------------------------------------|---------|------------------|
| 18s (Rn18s)    | 18S ribosomal RNA                                 | 97943   | Hs99999901_s1    |
| Aldh1a1        | Aldehyde dehydrogenase family 1, subfamily A1     | 1353450 | Mm00657317_m1    |
| Anapc5         | Anaphase-promoting complex subunit 5              | 1929722 | Mm00508066_m1    |
| Anln           | Anillin, actin binding protein                    | 1920174 | Mm00503748_m1    |
| Aurka          | Aurora kinase A                                   | 894678  | Mm01248177_m1    |
| Aurkb          | Aurora kinase B                                   | 107168  | Mm01718140_m1    |
| Bub1           | BUB1, mitotic checkpoint serine/threonine kinase  | 1100510 | Mm00660135_m1    |
| Bub1b          | BUB1B, mitotic checkpoint serine/threonine kinase | 1333889 | Mm00437811_m1    |
| Bub3           | BUB3 mitotic checkpoint protein                   | 1343463 | Mm01275713_m1    |
| Ccna2          | Cyclin A2                                         | 108069  | Mm00438064_m1    |
| Ccnb1          | Cyclin B1                                         | 88302   | Mm00838401_g1    |
| Ccnb2          | Cyclin B2                                         | 88311   | Mm00432351_m1    |
| Ccnf           | Cyclin F                                          | 102551  | Mm00432385_m1    |
| Cdc20          | Cell division cycle 20                            | 1859866 | Mm00650983_g1    |
| Cdca2          | Cell division cycle associated 2                  | 1919787 | Mm00558459_m1    |
| Cdk1           | Cyclin-dependent kinase 1                         | 88351   | Mm00772471_m1    |
| Cdk2           | Cyclin-dependent kinase 2                         | 104772  | Mm00443947_m1    |
| Cenpe          | Centromere protein E                              | 1098230 | Mm00620549_m1    |
| Chek1          | Checkpoint kinase 1                               | 1202065 | Mm01176757_m1    |
| Haus2          | HAUS augmin-like complex, subunit 2               | 1913546 | Mm00508375_m1    |
| Incenp         | Inner centromere protein                          | 1313288 | Mm01198109_m1    |
| Kif20a         | Kinesin family member 20A                         | 1201682 | Mm00436226_m1    |
| Kif2c          | Kinesin family member 2C                          | 1921054 | Mm00728630_s1    |
| LGN (Gpsm2)    | G-protein signalling modulator 2                  | 1923373 | Mm01195154_m1    |
| Mad2l1         | MAD2 mitotic arrest deficient-like 1              | 1860374 | Mm00786984_s1    |
| mInsc (Insc)   | INSC spindle orientation adaptor protein          | 1917942 | Mm00620583_m1    |
| Mis12          | MIS12 kinetochore complex component               | 1914389 | Mm00508986_m1    |
| Mphosph8       | M-phase phosphoprotein 8                          | 1922589 | Mm00470131_m1    |
| Ncapd2         | Non-SMC condensin I complex, subunit D2           | 1915548 | Mm00514073_m1    |
| NuMA (Numa1)   | Nuclear mitotic apparatus protein 1               | 2443665 | Mm00659817_m1    |
| Numb           | NUMB endocytic adaptor protein                    | 107423  | Mm00477927_m1    |
| Par3 (Pard3)   | Par-3 family cell polarity regulator              | 2135608 | Mm00473929_m1    |
| Par6 (Pard6a)  | Par-6 family cell polarity regulator alpha        | 1927223 | Mm00480004_m1    |
| Plk1           | Polo like kinase 1                                | 97621   | Mm00440924_g1    |
| Plk4           | Polo like kinase 4                                | 101783  | Mm00550358_m1    |
| Rpl13a         | Ribosomal protein L13A                            | 1351455 | Mm05910660_g1    |
| Rpl9           | Ribosomal protein L9                              | 1298373 | Mm00834201_g1    |
| Smc4           | Structural maintenance of chromosomes 4           | 1917349 | Mm00713073_m1    |
| Spag5 (Astrin) | Sperm associated antigen 5                        | 1927470 | Mm00840133_m1    |
| Top2a          | Topoisomerase (DNA) II alpha                      | 98790   | Mm00495703_m1    |

**Table S6. List of genes analyzed by qRT-PCR in the present study.** Gene symbols, gene names, [Mouse Genome Informatics](#) gene IDs and Taqman® assay IDs are indicated for each of the genes analyzed in this study.

## Supplementary Datasets

**Dataset 1, Dataset 2 and Dataset 3 are provided in Excel format.**

**Dataset 1.** List of gene sets used for Gene Set Enrichment Analysis (30) of aged p66Shc<sup>-/-</sup> vs WT mammosphere gene expression levels. Datasets were either downloaded from [MSigDB collections](#), or manually curated from already published data (31-35). Human orthologs of mouse genes were obtained using the [g:Orth \(Orthology Research\)](#) tool (70).

**Dataset 2.** List of mammary stem cell (MaSC)-genes differentially expressed in p66Shc<sup>-/-</sup> vs WT aged mammospheres, analyzed by RNA-sequencing. Genes listed here were categorized as “MaSC-markers” if satisfying one of the two following criteria: *i*) being present in at least 3 out of 5 datasets of genes upregulated in MaSCs (31-35), and/or *ii*) being object of a previously published functional study. Human and mouse gene symbols, along with literature references, gene expression fold changes and false discovery rates (FDR) are indicated.

**Dataset 3.** List of cell polarity-genes differentially expressed in p66Shc<sup>-/-</sup> vs WT aged mammospheres, analyzed by RNA-sequencing. Genes listed here were categorized as “cell polarity- or asymmetric division-markers” if object of a functional or descriptive study in vertebrates. Human and mouse gene symbols, along with literature references, gene expression fold changes and false discovery rates (FDR) are indicated.

## Original Data

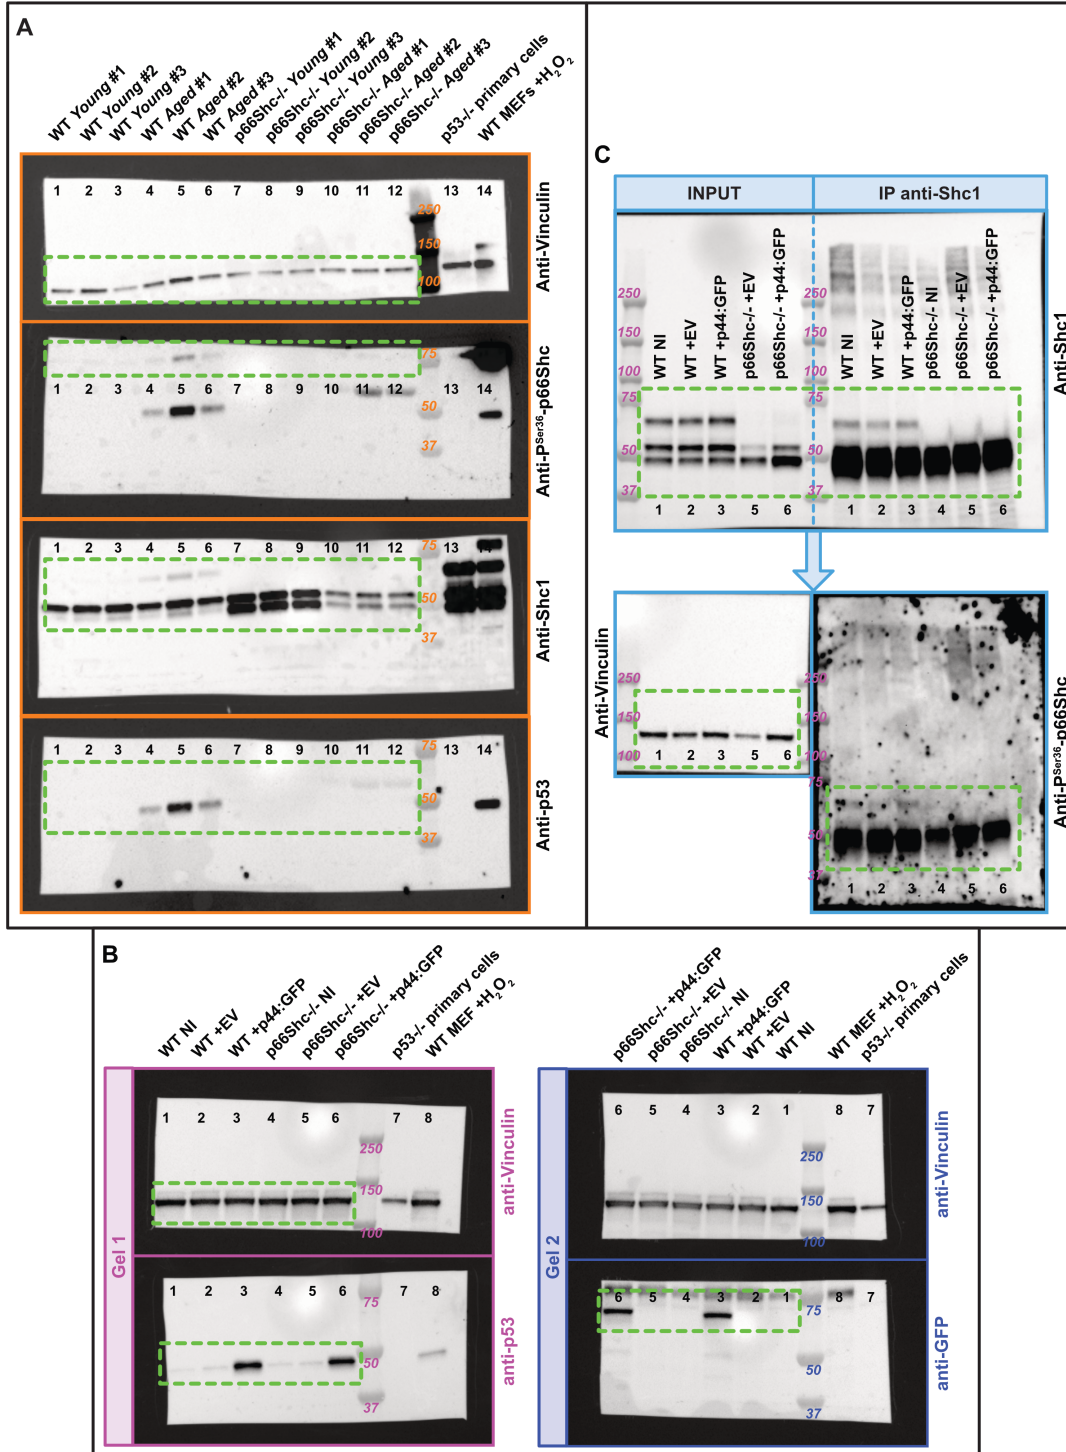

**Original Data. Uncropped western blot images. (A)** Appendix to Fig. 6A. **(B)** Appendix to Fig. S7A. **(C)** Appendix to Fig. S7B. In (A-C), colorimetric and chemiluminescent images of membranes were digitally acquired with a ChemiDoc XRS<sup>+</sup> instrument and merged using Image Lab software (Bio-Rad Laboratories); cropped areas are shown by green dashed lines; lane numbering, sample names, antibodies used and molecular weights of the protein marker bands are indicated.
